# Supplementary material for: Laboratory predictors for risk of revision surgery in pediatric septic arthritis
Source: J Child Orthop. 2016 May 12;10(3):247–54. doi: 10.1007/s11832-016-0736-6 (PMC4909651; doi:10.1007/s11832-016-0736-6)
Supplement: Supplementary file 3 — Multiple surgery cohort patient data (DOCX 111 kb) [file 11832_2016_736_MOESM3_ESM.docx]

| Supplement 3. Multiple Surgery Cohort Patient Data | | | | | | | | | | | |
| --- | --- | --- | --- | --- | --- | --- | --- | --- | --- | --- | --- |
| Case | **Age (Years)** | **Joint at Presentation** | **PMH /**  **Active Medical Issues** | **Hospital Course** | **Surgery** | **Delay in Dx (Days)** | **Organism** | **WBC**  **(103 cell/ mm3)** | **ESR (mm/ hr)** | **CRP (mg/dL)** | **Length of Stay (Days)** |
| 85 | 2.3 | Hip |  | Developed intramuscular thigh abscess 2 days after 1st surgery, MRI showed OM, no recurrent hip effusion | I&D x2 | 4 | MSSA | 19.2 | 50 | 14.9 | 10 |
| 86 | 5.1 | Hip |  | Persistent hip effusion, elevated CRP, lack of clinical improvement 4 days after 1st surgery | I&D x2 | 2 | MSSA | 5.6 | 31 | 6.3 | 9 |
| 87 | 7.2 | Knee |  | ICU admission. Initial concern for NSTI (neg). Presented with isolated right knee SA, MRI negative for OM. Developed left knee SA & bilateral distal femur OM 2 days after 2nd right knee surgery | I&D x6  Delayed wound closure x2 | 6 | MRSA | 7.3 | 29 | 15.9 | 41 |
| 88 | 6.5 | Hip |  | Presented with left hip SA, developed right hip SA 4 days after 1st surgery | I&D x2, left hip twice, right once | 2 | Negative Cx | 19.2 | 68 | 13.7 | 10 |
| 89 | 1.3 | Hip |  | Persistent hip effusion, increasing CRP and lack of clinical improvement 3 days after 1st surgery  Re-admitted 2 weeks after discharge with recurrent hip effusion and required 3 more I&Ds. No OM on MRI or on bone drilling | I&D x2, 1st admission  I&D x3 2nd admission | 10 | MSSA | 17 | 88 | 14.1 | 10 |
| 90 | 9.5 | Hip |  | Persistent hip effusion on post-op MRI (no OM), elevated CRP and lack of clinical improvement 3 days after 1st surgery | I&D x2 | 6 | MSSA | N/A | N/A | 15.8 | 10 |
| 91 | 4.8 | Hip |  | Presented with left hip SA, CT negative for OM/abscess. Developed right hip extra-articular abscess and multifocal pyomyositis 3 days after 1st surgery, MRI negative for OM | I&D x2 | 4 | MRSA | 3.9 | 60 | 27.9 | 14 |
| 92 | 5.7 | Hip |  | Lack of clinical improvement, elevated CRP 3 days after first surgery. Post-op MRI showed possible OM/abscess; small effusion, no OM/abscess found at 2nd surgery | I&D x2 | 2 | MSSA | 11.7 | 102 | 22 | 10 |
| 93 | 8.1 | Hip | Active: Superficial abrasion 5 days prior | Initially right hip SA, no OM on bone drilling in OR. Developed right femur OM and left hip SA 3 days after 1st surgery | I&D x6  Dressing change under ANES x3  Delayed wound closure x1 | 2 | MRSA | 21.1 | 25 | 14.9 | 27 |
| 94 | 4.9 | Hip |  | Presented with right hip SA, MRI negative for OM. Lack of clinical improvement, increasing CRP and purulent wound drainage after 1st and 2nd surgeries. MRI prior to 3rd surgery suggested OM but not found on bone drilling | I&D x3 | 3 | MSSA | 13 | 51 | 7.9 | 13 |
| 95 | 15.1 | Hip |  | Lack of clinical improvement and elevated CRP 9 days after 1st OR. MRI after 1st OR suggested deep pelvic abscess and OM but not found at 2nd surgery | I&D x2 | 2 | MSSA | 14.8 | 77 | 24.9 | 21 |
| 96 | 1.6 | Knee |  | Persistent purulent drainage, recurrent effusion, elevated CRP 4 days after 1st surgery | I&D x2 | 8 | Negative Cx | 22 | 20 | 1.1 | 11 |
| 97 | 14.4 | Knee | Active: Intra-articular foreign body s/p assault 2 weeks prior | Clinical deterioration, recurrent effusion, elevated CRP 4 days after 1st surgery | I&D x2 | 15 | *Propioni-bacterium* | N/A | N/A | N/A | 17 |
| 98 | 14.0 | Knee | PMH: Migraines  Active: infected ingrown toenail | Clinical deterioration, elevated CRP and OM 1.5 weeks after 1st OR. Lack of clinical improvement and elevated CRP after 2nd surgery. No purulence on bone drilling | I&D x3 | 14 | MRSA | 17.5 | 78 | 29.9 | 38 |
| 99 | 6.3 | Knee | Active: URI | Clinical deterioration, increasing CRP, recurrent effusion 5 days after 1st surgery. MRI suggested possible OM, no purulence in canal on bone drilling | I&D x2 | 4 | MSSA | 7.3 | 18 | 6.2 | 11 |
| 100 | 11.4 | Knee | PMH: Asthma | Increasing pain and CRP, and purulent wound drainage 2 days after 1st surgery. MRI demonstrated recurrent effusion and possible OM | I&D x2 | 0 | *Fusobacterium* | 6.9 | 80 | 8.2 | 11 |
| 101 | 10.9 | Knee |  | Developed increasing pain and CRP 4 days after 1st surgery. Developed proximal tibial OM | I&D x2 | 10 | *Strep. anginosus* | 23.2 | 104 | 24.6 | 11 |
| 102 | 7.4 | Ankle | Active: MRSA cellulitis, Influenza A URI, C. difficile colitis, GI bleed | ICU admission. Initial concern for NSTI (negative) and compartmental syndrome; anterior and lateral compartments opened with equivocal pressure measurements. Recurrent ankle effusion, elevated CRP 2 days after 1st surgery. Developed subperiosteal abscess, but not OM, after 2nd surgery | I&D x4 | 7 | MRSA | 6.6 | 40 | 18.9 | 20 |
| 103 | 17.5 | Wrist | Active: Lemierre's Syndrome, intracranial & trapezius abscesses, internal jugular & transverse sinus thrombosis | ICU admission. Continued wrist pain, elevated CRP 4 days after initial surgery. Developed volar wrist soft tissue abscess, demonstrated on MRI | I&D x2 | 10 | *Fusobacterium necrophorum & Strep. anginosus* | 23.6 | 11 | 23.7 | 27 |
| 104 | 11.3 | Hip | PMH: ADHD  Active: infected pierced ear 2 weeks prior. Septic shock, pericardial effusion, superficial femoral vein occlusive thrombus, septic renal & pulmonary emboli | ICU admission. Presented with hip SA, MRI negative for OM. Core decompression performed at 1st surgery with no OM. Developed right femur draining wound and OM 2 days after 1st surgery. Developed left hip SA after 2nd right hip surgery.  Re-admitted 6 weeks after DC for superficial right hip abscess debridement | I&D x8  Dressing change under ANES x2  Plastic surgery closure x1 | 5 | MRSA | 4.9 | 51 | 43.4 | 80 |
| 105 | 6.3 | Bilateral Hips | Active: septic shock, pancreatitis, colitis, hepatitis, septic pulmonary emboli, plural effusion, coronary artery dilatation | ICU admission. Presented with bilateral hip SA, CT negative for OM. Developed recurrent hip effusions and soft tissue abscesses with necrotic muscle bilaterally 12 days after 1st surgery. Developed right knee SA 3.5 weeks after 1st surgery | I&D x6  Suture removal under ANES x1 | 5 | *Strep. pyogenes* | 4.7 | 8 | 18.4 | 70 |
| Multiple surgery cohort patient data. All patients underwent a multiple surgeries for resolution of infection, and post-operative course notable for the issues listed. ADHD, attention deficit hyperactive disorder; ANES, anesthesia; CT, computed tomography; CRP, C-reactive protein; Cx, culture; ESR, erythrocyte sedimentation rate; GI, gastrointestinal; I&D, incision and drainage; MRI, magnetic resonance imaging; MRSA, methicillin resistant *Staph. aureus*; MSSA, methicillin sensitive *Staph. aureus*; NSTI, necrotizing soft tissue infection; OM, osteomyelitis; SA, septic arthritis; URI, upper respiratory infection; UTI, urinary tract infection; WBC, white blood cell | | | | | | | | | | | |
